# Id proteins in the vasculature: from molecular biology to cardiopulmonary medicine

Jun Yang<sup>1\*</sup>, Xiaohui Li<sup>2</sup>, and Nicholas W. Morrell<sup>3\*</sup>

<sup>1</sup>Department of Cell Biology, Institute of Basic Medical Sciences, Chinese Academy of Medical Sciences & Peking Union Medical College, 5 DongdanSantiao, Beijing 100005, China; <sup>2</sup>Department of Pharmacology, School of Pharmaceutical Science, Central South University, Changsha, China; and <sup>3</sup>Department of Medicine, University of Cambridge School of Clinical Medicine, Level 5, Addenbrooke's Hospital, Hills Road, Cambridge CB2 0QQ, UK

Received 7 January 2014; revised 14 September 2014; accepted 19 September 2014; online publish-ahead-of-print 1 October 2014

The inhibitors of differentiation (Id) proteins belong to the helix-loop-helix group of transcription factors and regulate cell differentiation and proliferation. Recent studies have reported that Id proteins play important roles in cardiogenesis and formation of the vasculature. We have also demonstrated that heritable pulmonary arterial hypertension (HPAH) patients have dysregulated Id gene expression in pulmonary artery smooth muscle cells. The interaction between bone morphogenetic proteins and other growth factors or cytokines regulates Id gene expression, which impacts on pulmonary vascular cell differentiation and proliferation. Exploration of the roles of Id proteins in vascular remodelling that occurs in PAH and atherosclerosis might provide new insights into the molecular basis of these diseases. In addition, current progress in identification of the interactors of Id proteins will further the understanding of the function of Ids in vascular cells and enable the identification of novel targets for therapy in PAH and other cardiovascular diseases.

**Keywords** Id • Inhibitor of DNA binding • Vasculature • PAH • Pulmonary arterial hypertension

## 1. Introduction

Impairment of vessel structure and function in response to pathophysiological factors contributes to numerous cardiovascular disorders. Endothelial dysfunction is an important early feature of vessel injury and promotes vasoconstriction leading to hypertension.<sup>1</sup> Abnormal remodelling of the vessel wall is common in atherosclerosis, systemic and pulmonary hypertension, and restenosis following vein grafting or angioplasty.<sup>2,3</sup> In addition, disordered angiogenesis is important in diseases such as pulmonary arterial hypertension (PAH) and also is an important contributor to tumour growth.<sup>4</sup>

Transcription factors are widely expressed in vascular cells and contribute to the maintenance of normal vessel homeostasis.<sup>5</sup> Several classes of transcription factors are known to be involved in the regulation of vascular cell differentiation and proliferation.<sup>6</sup> Recent studies implicate the Id family of proteins, which are helix-loop-helix (HLH) transcription factors, as important regulators of vascular cell function. Based on the dominant-negative effect of Id proteins on transcription factor binding, they promote wide-ranging effects on the expression of genes involved in vasculogenesis and angiogenesis.<sup>7–9</sup> Id proteins interact with tissue-specific transcription factors, but are also themselves regulated by key peptides and cytokines involved in vascular function, including angiotensin II, bone morphogenetic protein (BMP), and VEGF.<sup>10–12</sup> Id proteins act as orchestrators of multiple biological responses induced by these and other cytokines. Here, we will review the biological function of Id proteins in the cardiovascular system by

examining their known protein-binding partners and gene targets, and then focus on the role of Id proteins in cardiogenesis, vascular cells, and cardiovascular diseases such as pulmonary hypertension and atherosclerosis. Finally, the potential of Id proteins as a new therapeutic target will be discussed.

### 1.1 Inhibitors of DNA binding and inhibitors of differentiation

Id proteins were first identified in 1990.<sup>13</sup> Since then four members of the Id family, Id1–Id4, have been identified in mammalian cells,<sup>14–16</sup> with differing expression patterns and protein structure. For example, Id4 is expressed at a much lower level in the vascular wall than the other three Id proteins.<sup>17</sup> Id2, Id3, and Id4 but not Id1 possess a consensus cyclin-dependent kinase 2 (CDK2) phosphorylation site in the N-terminus (Figure 1).<sup>18,19</sup> Further details of the specific differences between Id proteins are summarized in Table 1. These differences may have important functional consequences. For example, only Id2 binds specifically with retinoblastoma protein to induce cell cycle arrest, whereas Id3 induces apoptosis in vascular lesions by other mechanisms.<sup>26,32</sup>

Id proteins belong to the HLH family of transcription factors. Usually, basic HLH (bHLH) transcription factors possess a basic DNA-binding domain and a HLH region that mediates protein–protein interactions. bHLH factors activate transcription as homodimeric or heterodimeric complexes through binding to DNA where there is a specific recognition motif in the promoter region of the target gene, named E-box

\* Corresponding author. Tel: +44 1223 331666/+86 1069156976; fax: +44 1223 336846, Email: nwm23@cam.ac.uk (N.W.M.); jy270@ibms.pumc.edu.cn (J.Y.)

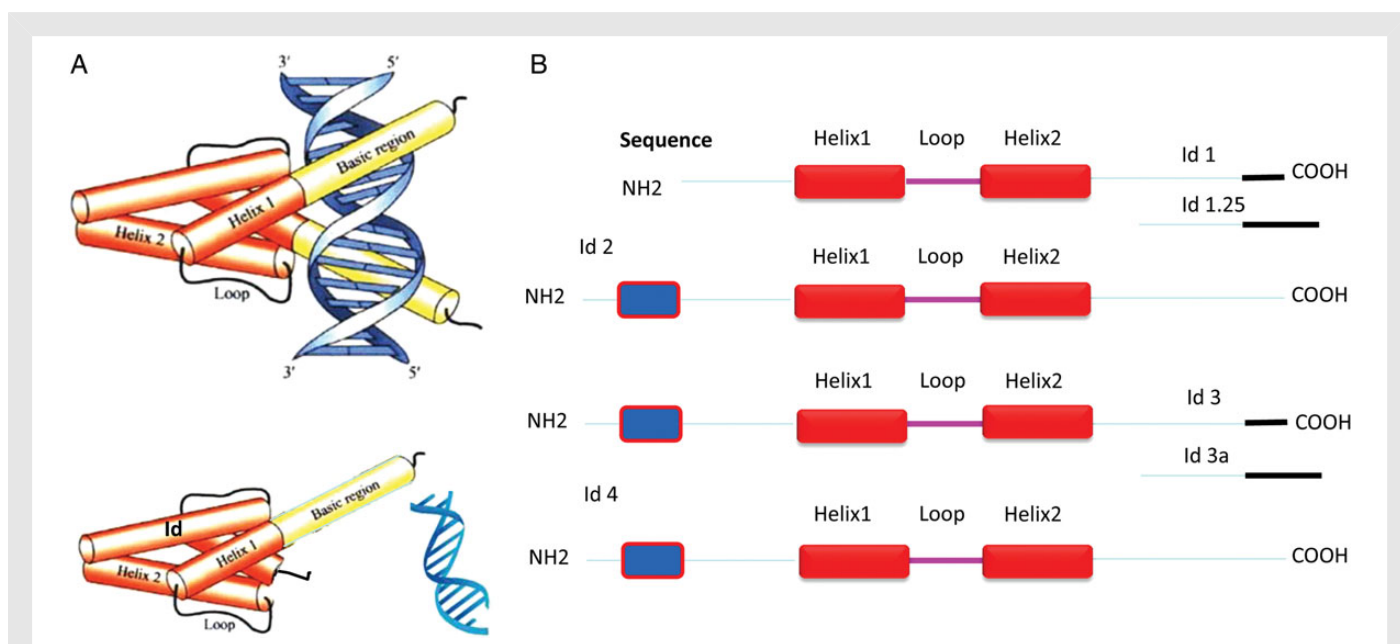

**Figure 1** The structure and sequence homology of Id proteins. (A) bHLH proteins form dimers in order to bind to DNA (upper), and Id proteins have no basic region and inhibit the binding of bHLH protein to DNA through dimerization (lower). (B) The amino acid sequence differences between Id1, Id2, Id3, and Id4. The blue box represents the CDK2 phosphorylation site on the N-terminal regions of Id2, Id3, and Id4. The HLH conserved sequence is important for Id dimerization with other E proteins. Id1 and Id3 may exist as isoforms: Id1.25 and Id3a, resulting from intron retention at the C terminus.

**Table 1** The known functions of individual Id proteins in vascular cells

| Official human gene symbol | Alternative name | Human chromosome | Subtype              | Effect on ECs                                                                    | Effect on EPCs                                                                                    | Effect on VSMCs                                                                                         |
|----------------------------|------------------|------------------|----------------------|----------------------------------------------------------------------------------|---------------------------------------------------------------------------------------------------|---------------------------------------------------------------------------------------------------------|
| Id1                        | bHLHb24          | 20q11            | Id1.25 <sup>20</sup> | Pro-angiogenesis <sup>5</sup><br>Activates ECs <sup>21</sup>                     | Controls EPCs formation <sup>5,22</sup><br>Promotes EPC migration and proliferation <sup>23</sup> | Mediates MAPK and angiotensin II-induced proliferation <sup>6</sup>                                     |
| Id2                        | bHLHb26          | 2p25             |                      | Activate ECs <sup>21</sup><br>Proliferation and differentiation <sup>24</sup>    |                                                                                                   | Modulates phenotype <sup>25</sup>                                                                       |
| Id3                        | bHLHb25          | 1p36.13–p36.12   | Id3a <sup>26</sup>   | Pro-angiogenesis <sup>5</sup><br>Proliferation and differentiation <sup>24</sup> | Controls EPCs formation <sup>5</sup>                                                              | Proliferation <sup>10,26–30</sup><br>Modulates phenotype <sup>25</sup><br>Differentiation <sup>31</sup> |
| Id4                        | bHLHb27          | 6p22.3           |                      |                                                                                  |                                                                                                   |                                                                                                         |

(CANNTG) or N-box (CACNAG), where *N* = any nucleotide.<sup>33,34</sup> While Id proteins lack the basic DNA-binding domain, they still form heterodimers with bHLH transcription factors. However, the resulting complex cannot bind with DNA and promote gene transcription. Thus, Id proteins function as dominant-negative transcriptional regulators and have been named ‘inhibitors of DNA binding’. Soon after their identification, Id proteins were found to be associated with cell differentiation. In mammalian cell culture systems, Id expression was down-regulated during the differentiation of some cell lineages.<sup>35–38</sup> *In vivo* studies showed that targeted expression of Id genes could inhibit muscle cell differentiation.<sup>39</sup> Thus, Id proteins are also alternatively known as inhibitors of differentiation.

Id genes demonstrate characteristics of early response genes that respond to a multitude of ligand-receptor combinations at the cell surface. However, much less is known about the range of extracellular

signals that trigger expression of Id gene. Members of the transforming growth factor (TGF $\beta$ ) superfamily, including BMPs and TGF- $\beta$ , regulate Id1 expression via Smad-dependant pathways in certain cell types, and the regulation occurs at the level of the Id promoter.<sup>40</sup> Id protein levels can also be regulated via the ubiquitin-proteasome degradation pathway or by phosphorylation during cell cycle progression. It has been reported that Id proteins turn over quickly after activation and have a short half-life of ~20 min in HEK293 cells. The half-life varies for individual Ids and is dependent on the cell type. It is noteworthy that when Id proteins exist in the heterodimeric state, they are less sensitive to degradation by the 26S proteasome. In addition, the localization of Id proteins from cytoplasm to nucleus only occurs following formation of the heterodimer.<sup>41</sup> These studies suggest the important relationship between Id protein stability, localization, and function, though the precise relevance of this, has not yet been revealed.

## 1.2 Id protein-binding partners and targets

The main targets of Id proteins are E-proteins (e.g. E12, E47, E2-2, and HEB), which belong to the class I of bHLH transcription factors.<sup>42–44</sup> E-proteins are ubiquitously expressed in many tissues including the vasculature. They also associate with class II bHLH factors (e.g. MyoD and NeuroD), forming heterodimers, and modulate cell type-specific gene transcription and cellular differentiation.<sup>6</sup> Id proteins can interact with class I and II bHLH factors, but individual Id proteins have distinct preferences for these targets.<sup>13,45</sup> Id proteins bind to class I bHLH factors (E12, E47, E2-2, and HEB) with high affinity. In contrast, a broad range of affinities exists for class II proteins, such as the myogenic regulatory factors (MyoD, myogenin, Myf-5, and MRF4/MYF-6). No interactions were observed between the Ids and the haematopoietic bHLH factors (Scl/Tal-1, Tal-2, and Lyl-1). The first helix of the HLH domain of the Id protein and the residues immediately adjacent to it are responsible for the dimerization selectivity.<sup>46</sup> In addition to bHLH factors, Id proteins can also interact with some non-bHLH factors and this function is probably as important as the Id–bHLH interactions. For example, non-bHLH-binding partners, such as Rb (retinoblastoma protein, a tumor suppressor protein), ETS (E26 transformation-specific or E-twenty-six, one of the largest families of transcription factors), and PAX (paired box transcription factors, the important regulators in early development), are known for their roles in cell fate determination; proteasome components were reported recently as another important group of non-bHLH interactors with Id proteins.<sup>32</sup>

Recently, new binding partners have been identified (Table 2), including hairy and enhancer of split-1 (Hes1) and dead ringer-like-1 (Dril1) that have a similar protein structure to Id1.<sup>47,54</sup> Bai et al. showed that Id proteins interact directly with Hes1 and release the negative feedback autoregulation of Hes1 without interfering with its ability to affect other target genes. These results indicate that Id proteins participate in the maintenance of neural stem cells through sustaining Hes1 expression in early embryos.<sup>54</sup> The interaction with Hes1 also facilitates the Ids to regulate tip- vs. stalk-cell selection and vessel plasticity.<sup>8</sup> Since Notch3 activation of Hes5 was found to be crucial for the proliferation of smooth muscle cells in animal models of PAH, the interaction of Ids with Hes family members warrants further studies in this setting.<sup>61</sup> Furthermore, Id1 interacts with Dril1 to interrupt its binding to DNA, providing a potential mechanism for suppression of fibrosis through inhibition of the profibrotic function of Dril1.<sup>47</sup>

Id1, Id2, and Id3 are subject to ubiquitination and subsequent degradation by the 26S proteasome. Ling et al.<sup>49</sup> reported that Id1 interacts with the Hepatitis-B virus-encoded protein HBX, and that Id1 binds to the proteasome subunit C8 to facilitate its interaction with the HBX protein. In addition, the proteasome subunit S5a was previously isolated as an Id1-interacting protein.<sup>48</sup> A yeast two hybrid screen identified that Id3 interacts with a mouse JAB1 homologue, which is related to factors thought to be present in the 19S regulatory complex of the 26S proteasome.<sup>48</sup> The ubiquitously expressed APC/Cdh1 complex is an E3 ubiquitin ligase that governs Id2 stability and reprogrammes quiescent neurons into the axonal growth mode.<sup>55</sup> Ubiquitin-specific protease 1 (USP1) deubiquitinates and stabilizes Id1, Id2, and Id3. USP1 directly interacts with Id2 in HOS and U2-OS cells to preserve the stem cell state.<sup>50</sup>

More recently, endogenous inhibitors of Ids have been discovered in neuroblastoma cells, including an inhibitor of Id2, known as 13I. 13I was isolated from a phage display library of HLH domains, harbouring amino acid substitutions in residues critical for dimerization.<sup>62</sup> 13I selectively

binds to Id2, impairs complex formation with Rb, and relieves repression of E protein-activated transcription. A novel peptide aptamer, Id1/3-PA7, was found to specifically interact with Id1 and Id3. Id1/3-PA7 deregulated expression of Id1 and Id3, releasing E47 to activate the E-box promoter and increased the expression level of CDK inhibitors, p16 and p21. This non-toxic exogenous agent led to antiproliferative and apoptotic effects in ovarian cancer cells.<sup>63</sup> Although Id proteins have been found to be expressed at high level in most types of cancer, they can also act as tumour suppressors in certain lymphomas.<sup>32</sup> Thus, understanding the cell-specific and tumour-specific effects of Id modulators is of great importance before embarking on clinical trials.

## 1.3 Role of BMP type II receptor and Ids in cardiogenesis

BMPs are pleiotropic cytokines regulating growth, differentiation, and apoptosis in diverse cell types and act as instructive signals during embryogenesis. BMPRII, like other TGF $\beta$  superfamily type II receptors, is a constitutively active serine/threonine kinase. BMPs signal via three type II receptors (BMPRII, ActRIIA, and ActRIIB). Binding of ligand leads to the assembly of a hetero-oligomeric receptor complex in which the type II receptor phosphorylates and activates the type I receptor. The activated type I receptor then phosphorylates intercellular signalling molecules, termed Smads. Smad complexes translocate into the nucleus to regulate transcription of target genes. Id HLH proteins are among of the most highly regulated downstream targets of BMP/Smad signalling.<sup>12,21,24</sup>

It was reported in 2000 by two groups that heterozygous germ-line mutations in BMP type II receptor caused >70% of cases of familial PAH.<sup>64–66</sup> Homozygous *bmpr2* knockout (KO) mouse die during gastrulation without forming mesoderm. Heterozygous *bmpr2* KO mice (heterozygous mutation generated by deletion of exon 4, 5, 6 in C57BL/6j mice) recapitulate the major effect of BMPRII mutations in man, which is haploinsufficiency. In response to an additional injury, such as inflammation, hypoxia, or serotonin, heterozygous *bmpr2* KO mice developed pulmonary hypertension and remodelling of the pulmonary vasculature.<sup>67</sup> Beppu et al. employed Mox2-Cre to delete *bmpr2* throughout the embryo during gastrulation (targeting the epiblast at E5.5). These investigators found cardiac defects including double-outlet right ventricle, ventricular septal defect (VSD), atrioventricular cushion defects, and thickened valve leaflets in these mice. BMPRII was also required for proper positioning of the aorta (Figure 2). Thus, although there was no obvious myocardial defect in these mice, endocardial BMPRII expression was required for septum formation and valvulogenesis.<sup>68</sup>

Similar defects were also found in compound Id KO mice lacking Id1, Id2, and Id3 (Id1<sup>-/-</sup>Id3<sup>-/-</sup>; Id1<sup>-/-</sup>Id2<sup>-/-</sup>; Id1<sup>-/-</sup>Id2<sup>+/-</sup>Id3<sup>-/-</sup>; and Id1<sup>+/-</sup>Id2<sup>+/-</sup>Id3<sup>-/-</sup>).<sup>69,70</sup> In the developing heart, Id1, Id2, and Id3 are detected in the endocardium and epicardium from embryonic day E10.5 through E16.5, but Id4 is absent. Id1 and Id3 expression persists in these regions at post-natal day P7. Id1, Id2, or Id3 single KO embryos do not exhibit developmental abnormalities, but double- and triple-Id KO embryos display severe cardiac defects and die at mid-gestation. Double KO embryos displayed VSDs associated with impaired ventricular trabeculation and thinning of the compact myocardium. Since the defect in the myocardium was not observed in BMPRII<sup>fllox/-</sup> Mox2-Cre mice, the lack of expression of Ids in the myocardium provides support for the idea that the myocardial defect of Id KO mice may arise from dysregulated molecular signalling between the myocardium and the epicardium or endocardium. Compound Id KO mouse

**Table 2 Binding partners of Id proteins and their biological function (©: common for Id1, Id2, Id3; 1&3: common for Id1 and Id3; 2&3: common for Id2 and Id3)**

| Id                  | Class I HLH-binding partner | Other class HLH | Non-HLH factors               | Targeted gene and downstream effector                                        | References                                                                   |      |
|---------------------|-----------------------------|-----------------|-------------------------------|------------------------------------------------------------------------------|------------------------------------------------------------------------------|------|
| Id1                 | E47                         | Dril1           |                               | Mediates BMP-induced EC migration                                            | (12)                                                                         |      |
|                     |                             |                 |                               | Suppression of fibrosis through inhibiting Dril1                             | (47)                                                                         |      |
|                     |                             |                 | 26S proteasome subunit S5a    | Regulates terminal myogenic differentiation                                  | (48)                                                                         |      |
|                     | E12, E47, E2-2, HEB         | MyoD, Myf-5     |                               | 20S proteasome subunit C8                                                    | Regulates HBX protein stability in HCC cells                                 | (49) |
|                     |                             |                 |                               | Plays a role in myogenesis©                                                  | (46)                                                                         |      |
|                     | E47                         | Hes1            | USP1                          |                                                                              | Preserves a mesenchymal stem cell programme in osteosarcoma©                 | (50) |
|                     |                             |                 |                               |                                                                              | Suppresses Rap1GAP to synchronize stemness with adhesion©                    | (9)  |
|                     | E47                         | Hes1            | USP1                          |                                                                              | Regulates tip- vs. stalk-cell selection and vessel plasticity©               | (8)  |
|                     |                             |                 |                               |                                                                              | Suppression of neural differentiation©                                       | (51) |
|                     | E47                         | Hes1            | USP1                          |                                                                              | Regulates p21 to control NIH 3T3 cells growth (1&3)                          | (52) |
|                     |                             |                 |                               | Regulates p16 and VEGF-induced angiogenesis in ECs (1&3)                     | (11)                                                                         |      |
| E2-2                | Hes1                        | USP1            |                               | Regulates p16/p21 in prostate cancer cells independent of E protein (1&3)    | (53)                                                                         |      |
|                     |                             |                 |                               | Neural stem cells maintenance in early embryos                               | (54)                                                                         |      |
| Id2                 | E47                         | Hes1            | APC/Cdh1 (E3ubiquitin ligase) | Inhibition of axonal growth                                                  | (55)                                                                         |      |
|                     |                             |                 |                               |                                                                              | Mediates cell cycle regulation by Myc                                        | (56) |
|                     |                             |                 |                               |                                                                              | Promotes cell death by increase Bax level independent of E protein           | (57) |
|                     | E12, E47, E2-2, HEB         | MyoD, Myf-5     | USP1                          |                                                                              | Plays a role in myogenesis©                                                  | (46) |
|                     |                             |                 |                               |                                                                              | Preserves a mesenchymal stem cell programme in osteosarcoma©                 | (50) |
|                     | E47                         | Hes1            | USP1                          |                                                                              | Suppresses Rap1GAP to synchronize stemness with adhesion©                    | (9)  |
|                     |                             |                 |                               |                                                                              | Regulates tip- vs. stalk-cell selection and vessel plasticity©               | (8)  |
|                     | SRF/E12                     | Hes1            | USP1                          |                                                                              | Binding on SM- $\alpha$ -actin promoter to control SMC differentiation (2&3) | (25) |
|                     |                             |                 |                               |                                                                              |                                                                              |      |
|                     | Id3                         | E47             | Hes1                          | USP1                                                                         | SREBP-1c-mediated adiponectin expression                                     | (58) |
|                     |                             |                 |                               |                                                                              | Regulates VSMCs through P21 within vascular lesion                           | (26) |
| E12, E47, E2-2, HEB |                             | MyoD, Myf-5     | USP1                          |                                                                              | Degraded through the ubiquitin-proteasome pathway when E47 is absent         | (48) |
|                     |                             |                 |                               |                                                                              | Plays a role in myogenesis©                                                  | (46) |
| E47                 |                             | Hes1            | USP1                          |                                                                              | Preserves a mesenchymal stem cell programme in osteosarcoma©                 | (50) |
|                     |                             |                 |                               |                                                                              | Suppresses Rap1GAP to synchronize stemness with adhesion©                    | (9)  |
| E12, E47, E2-2, HEB |                             | MyoD            | USP1                          |                                                                              | Regulates tip- vs. stalk-cell selection and vessel plasticity©               | (8)  |
|                     |                             |                 |                               |                                                                              | Negatively regulates E2A to inhibit fibroblasts growth by serum (3)          | (59) |
| SRF/E12             | MyoD                        | USP1            |                               | Binding on SM- $\alpha$ -actin promoter to control SMC differentiation (2&3) | (25)                                                                         |      |
|                     |                             |                 |                               |                                                                              |                                                                              |      |
| Id4                 |                             |                 |                               | Suppresses tumour growth through AR, p21, p27, and p53 in prostate cancer    | (60)                                                                         |      |

demonstrates more severe septal defects and disrupted endocardial cell lining, which suggests that the Id genes are important target genes of a range of BMP receptors during cardiogenesis.

### 1.4 Id proteins in endothelial cells and angiogenesis

BMPs induce Id gene expression in endothelial cells (ECs) and vascular smooth muscle cells (VSMCs). Besides BMPs, growth and differentiation factor 5 (GDF5) and TGF- $\beta$  also regulate the expression of Id proteins. GDF5 induces Id1 and Id3 expression in human umbilical vein smooth muscle cells.<sup>71</sup> Although, TGF- $\beta$  induces the expression of Id genes, this

tends to be transient in some cell types due to induction of Id1 that is then suppressed by cyclic AMP-dependent transcription factor 3.<sup>72</sup>

Although previous reviews described the role of Id proteins in angiogenesis during tumour formation, their effects on the disordered angiogenesis in PAH still remain unclear.<sup>73</sup> Here, we review updated information about the involvement of Id gene induction by diverse stimuli and their contribution to angiogenesis and vascular remodelling.

Proliferation and migration of ECs is necessary for angiogenesis. Id proteins are thought to act as pro-angiogenic factors by regulating migration, proliferation, and apoptosis of ECs. Id1, Id2, and Id3 are all expressed by human ECs derived from the microvasculature and pulmonary artery, and in smooth muscle cells derived from the aorta and pulmonary artery (PASMCs).<sup>38,74</sup> Human umbilical vein endothelial

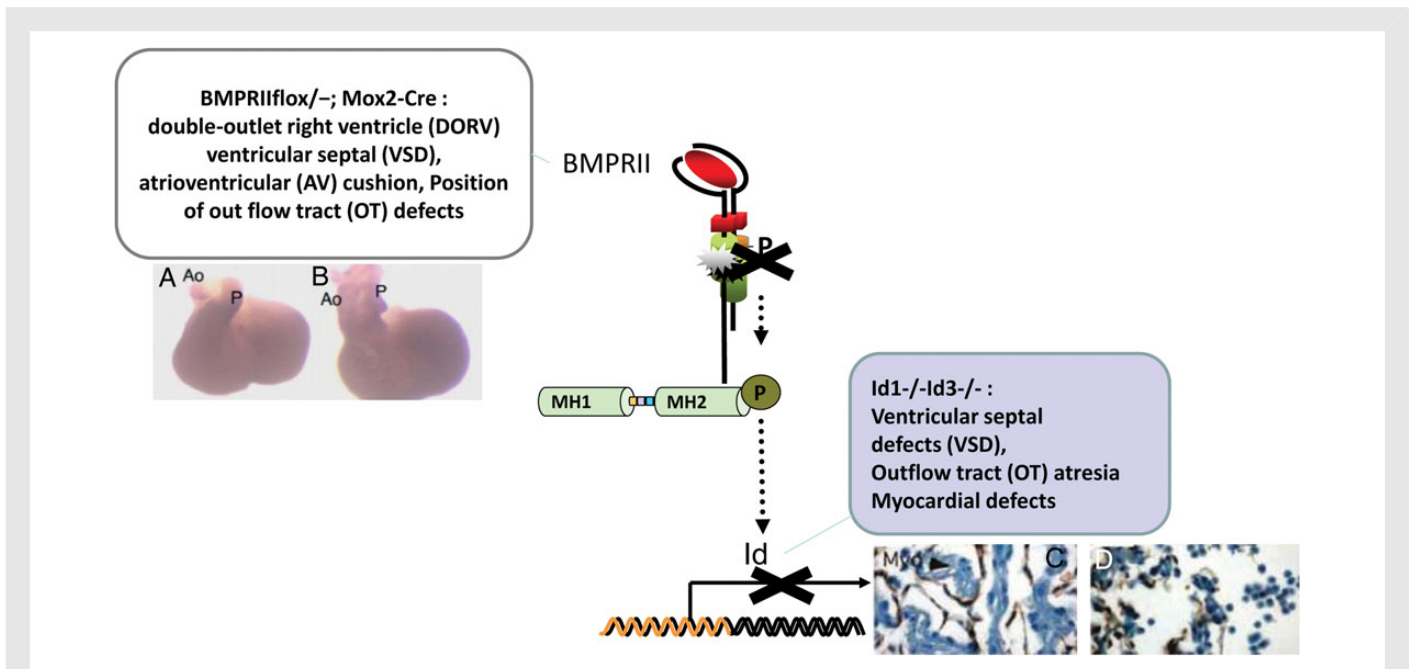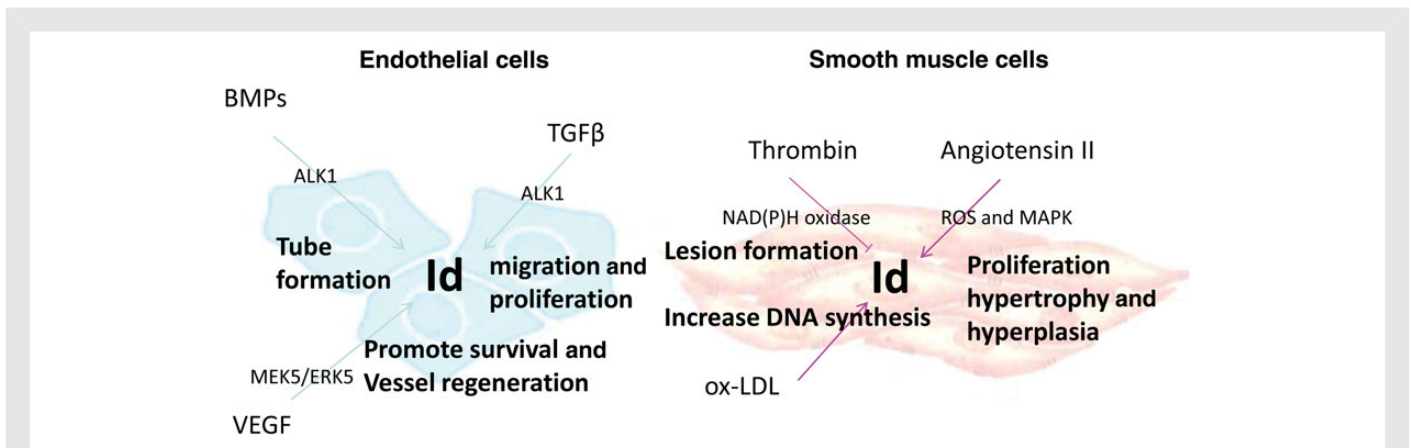

cells (HUVECs) overexpressing Id1 and transplanted into the hind limbs of mice accelerated recovery of blood flow and increased capillary density in the ischaemia area.<sup>75</sup> Conversely, knockdown of Id1 abolished VEGF-induced angiogenic responses in HUVECs.<sup>11</sup> The expression of Id proteins are induced in response to several EC mitogens including BMPs, TGF-β, and VEGF (Figure 3). It has been suggested that Id genes are the main mediators of BMP effects on ECs.<sup>76,77</sup> For example, Id1 was found to mediate EC migration and tube formation induced by BMP6 and ectopic expression of Id1 in cultured ECs enhanced capillary-like tube

formation *in vitro*.<sup>12</sup> It is of interest that Id1 and Id2 can only be induced by TGF-β through the activin receptor like kinase 1 (ALK1) receptor but not the ALK5 receptor in HUVECs.<sup>78</sup> High levels of TGF-β inhibit EC migration and proliferation through the induction of plasminogen activator inhibitor 1 (PAI-1) gene expression, whereas low levels of TGF-β stimulate EC migration and proliferation dependent on Id1 expression. Furthermore, endoglin activates ECs under hypoxic conditions through up-regulating the ALK1/Id1 pathway rather than ALK5.<sup>79</sup> It should be pointed out that the actions of VEGF and Id proteins

are closely linked in the vasculature. The angiogenic defect in compound Id-deficient mice is due to impaired VEGF-driven mobilization of VEGFR2 (vascular endothelial growth factor receptor 1, also known as Flk-1, KDR)-positive circulating endothelial precursor cells and impaired proliferation of VEGFR1 (vascular endothelial growth factor receptor 1, also known as Flt1)-positive cells.<sup>7</sup> Another study revealed that VEGF induces Id1 expression through VEGFR2 signalling in liver sinusoidal endothelial cells.<sup>80</sup> The use of VEGFR-specific inhibitors could lead to a better understanding of the roles of VEGF as a pro-angiogenic factor in the pathology of PAH. The first VEGF receptor 2 inhibitor, SU5416, was originally in clinical development for cancer therapy. In rodent models of PAH, the administration of SU5416 combined with chronic hypoxia results in severe angioproliferative PAH accompanied by neointimal thickening. It is believed that the inhibition of VEGFR2 increases the apoptosis of ECs, and favours the survival of apoptosis-resistant cells. It is hypothesized that hyperproliferation of these apoptosis-resistant clones of ECs gives rise to the characteristic plexiform lesions in human PAH. The up-regulation of BMP receptor signalling via the Smad/Id pathway has been shown to promote pulmonary arterial endothelial cells survival, prevent loss of vessels, and induce vessel regeneration in PAH.<sup>81</sup> It is thus likely that Id proteins contribute to the complex interplay between EC apoptosis and proliferation in PAH.

As to the mechanism of the angiogenic effects of Id proteins, it is known that inhibition of thrombospondin-1 by Id proteins is involved in the induction of angiogenesis.<sup>82</sup> Doebele *et al.*<sup>83</sup> found that VEGF up-regulated Id1 expression via the MEK5/ERK5 pathway in ECs. In addition, overexpression of Id1 enhanced the expression of intercellular cell adhesion molecule-1 and E-selectin, induced angiogenic processes such as EC migration, and increased activity of MMP-2 and -9.<sup>11</sup>

Id1 also promotes the generation, proliferation, and migration of endothelial progenitor cells (EPCs).<sup>23</sup> Recently, Id proteins were recognized as a biomarker of EPCs since Id1 can be used to track EPCs from the bone marrow (BM). Silencing of Id1 caused ablation of BM-derived EPCs and led to significant defects in angiogenesis-mediated tumour growth.<sup>84</sup> Id1 mutant mice demonstrate an absence of EPCs in peripheral blood. The generation of EPCs in BM appears to be dependent on the repression of p21 by Id1.<sup>22</sup>

## 1.5 Id proteins and VSMCs

Id proteins are abundantly expressed in VSMCs and regulate their proliferation and differentiation.<sup>6</sup> Id proteins are involved in the proliferative responses of VSMCs to thrombin, angiotensin II, and oxidized low-density lipoprotein (ox-LDL). Thrombin regulates the expression of BMP4 and Id proteins in VSMCs via the NAD(P)H oxidase. During wire-induced vascular stenosis in mice, levels of Id1 and Id3 are reduced in the vascular media. However, mice deficient in p47phox—an important component of NAD(P)H—were resistant to vascular stenosis following injury and exhibited increased expression of Id1 and Id3.<sup>85</sup> In contrast, the hypertrophic activity of angiotensin II appears to be partly mediated by Id3 downstream of increased reactive oxygen species and MAPK signalling.<sup>27</sup> Another *in vivo* study also suggested that angiotensin II infusion could cause aortic VSMC hypertrophy and hyperplasia via up-regulating Id3.<sup>10</sup> Therefore, the roles of Id proteins under these experimental conditions warrant further investigation to delineate the precise contribution to vascular homeostasis and pathology.

Id proteins are also involved in lipid-induced VSMC growth. The growth-promoting effects of 12/15-lipoxygenase are partially mediated through induction of Id3 transcription.<sup>28</sup> In these studies, Id3 mediated

the mitogenic effect of hyperlipaemic sera and ox-LDL in VSMC via inhibition of p21cip1 expression, subsequently increasing DNA synthesis and proliferation.<sup>29</sup> These studies reveal an important role for Id proteins in lipid metabolism and atherosclerosis, which will be discussed further below. The interaction with Gut-enriched Kruppel-like factor may also explain the regulatory role of Id3 on VSMC proliferation in the pathogenesis of atherosclerosis.<sup>30</sup>

Id proteins play additional roles in the modulation of VSMC phenotype. Binding of class I bHLH proteins to the two E-boxes on the promoter region of the smooth muscle  $\alpha$ -actin ( $\alpha$ -SMA) gene, a differentiation marker of VSMCs, is required for the expression of  $\alpha$ -SMA *in vivo* and can be inhibited by Id proteins.<sup>25</sup> Id proteins are also involved in SMC differentiation from BM-derived cells where individual Id proteins show unique effects.<sup>31</sup> For example, Id2 mRNA expression was up-regulated in parallel with increased expression of the smooth muscle cell markers, myosin heavy chain, calponin, and  $\alpha$ -SMA, without a change in Id1 expression. However, in these cells, BMP4 induced Id1 expression along with a reduction of markers in smooth muscle cell differentiation.

## 1.6 Id proteins and atherosclerosis

In atherosclerosis, intimal plaques form as a consequence of endothelial dysfunction and the accumulation of lipid laden macrophages. Id proteins act as negative regulators of cellular differentiation and modulation of VSMC phenotype, which is a hallmark of the dedifferentiated phenotype of certain populations of SMCs observed in lesion formation in atherosclerosis and vasculoproliferative disorders (*Figure 4*). The role of the immune system in atherosclerosis is increasingly recognized. Recently, Doran *et al.*<sup>86</sup> revealed that Id3-mediated B cell homing is an important mechanism by which Id3 affords protection in atherosclerosis. As mentioned above, Id proteins are involved in lipid metabolism and Id3 has been shown to mediate VSMC growth induced by hyperlipaemia and ox-LDL.<sup>29</sup> One study found that Id3 and its partner E47 were novel regulators of adiponectin expression in differentiating adipocytes,<sup>58</sup> which might influence the process of atherosclerosis.

Matsumura *et al.*<sup>87</sup> found that Id3 was involved in the growth regulation of VSMCs in atherosclerotic plaques. Also, alternative splicing of Id3 protein is induced during vascular lesion formation, resulting in the appearance of the splice variant, Id3a. Id3a induces smooth muscle cell apoptosis and functions as a negative regulator to limit pathological vascular lesion formation in balloon-injured rat carotid arteries.<sup>26</sup> A single-nucleotide polymorphism variant at rs11574 in the human Id3 gene was independently associated with carotid intima-media thickness in patients. The fact that *Id3*<sup>-/-</sup>*ApoE*<sup>-/-</sup> (apolipoprotein E-deficient mice as an atherosclerosis model) mice developed significantly more atherosclerosis than *Id3*<sup>+/+</sup>*ApoE*<sup>-/-</sup> mice revealed a direct and robust relationship between Id proteins and atherosclerosis.<sup>88</sup> Furthermore, aortic VSMC proliferation was induced by angiotensin II via up-regulated Id3. These apparently conflicting reports of the role of Id proteins likely reflect the complex roles played by Id proteins induced by BMP signalling or other mediators in the cellular context. To highlight this complexity, recent studies have shown that inhibition of BMP signalling with the selective small molecule BMP type I receptor inhibitor, LDN-193189, protects against atherosclerosis and associated vascular calcification.<sup>89</sup> In contrast, specific endothelial deficiency of BMPRII induced endothelial inflammation and contributed to the development of atherosclerosis.<sup>90</sup>

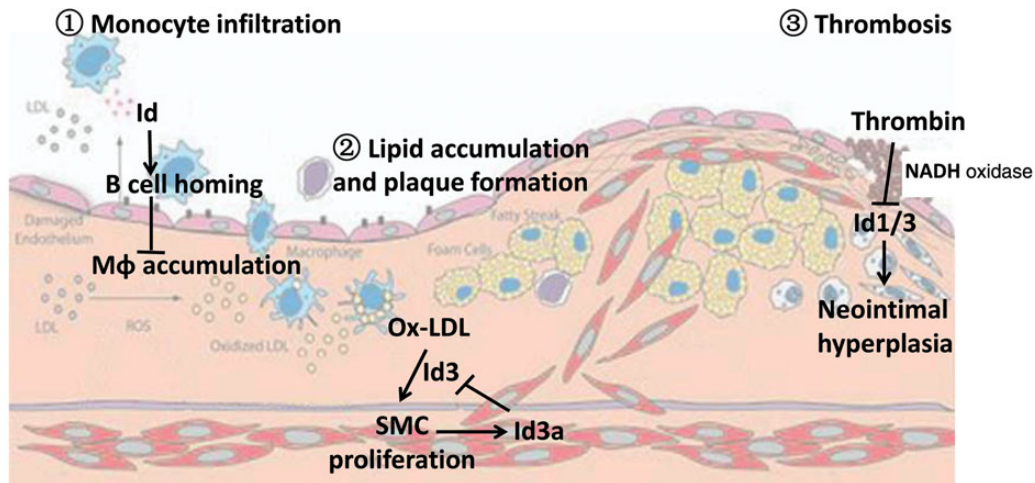

**Figure 4** Id proteins are involved in the development of atherosclerosis. When monocyte infiltration occurs initially, Id3-mediated B cell homing plays a role in limiting macrophage accumulation. Later, during lipid accumulation and plaque formation, ox-LDL-driven proliferation of smooth muscle cells is mediated by Id3. The intron retention isoform of Id3, Id3a, functions in a negative feedback loop to down-regulate the expression of Id3. Id proteins also participate in thrombin-induced neointimal hyperplasia.

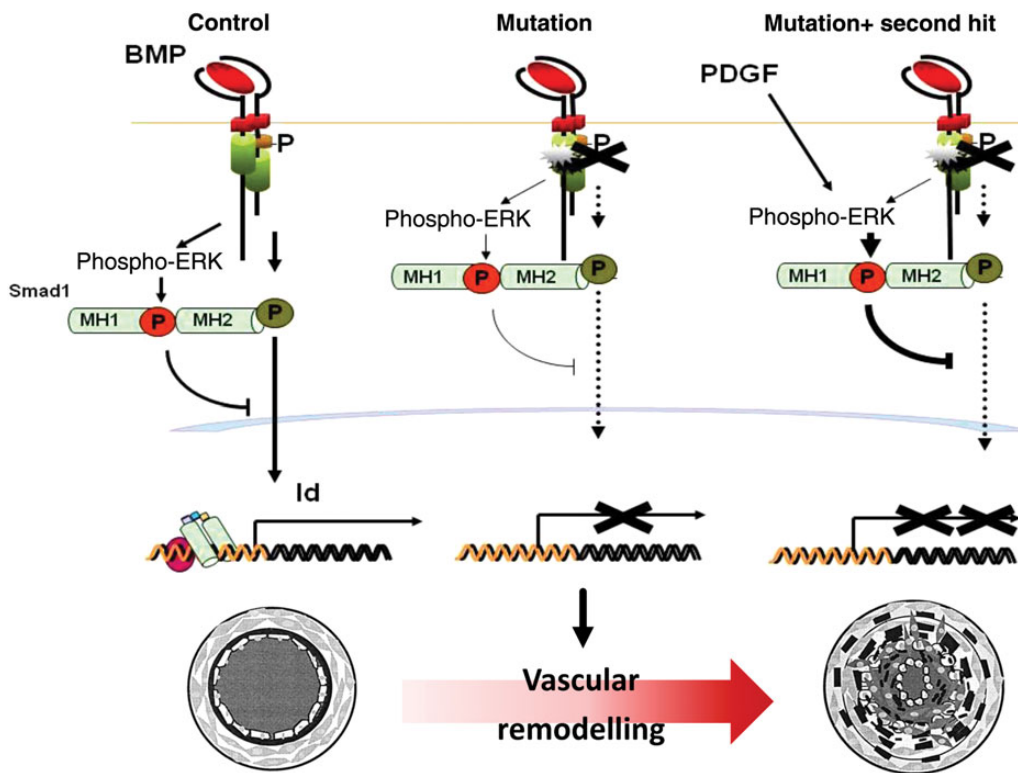

**Figure 5** The deficient BMP signalling and second 'hit' hypothesis in PAH. In control human pulmonary arterial smooth muscle cells (hPASMCs), BMPs activate BMPRII and signal through Smad1 activation, whereby C-terminal phosphorylated Smad1 forms a transcriptional complex to bind the promoter region of Id genes. BMP signalling is important to inhibit proliferation of hPASMCs. At the same time, BMPRII activates ERK to phosphorylate Smad1 at its linker region to restrict the C terminal phosphorylation. When the BMP type II receptor is mutated, there is a reduction in Id gene transcription. In the presence of PDGF or other environment stimulation, constituting the 'second hit', the enhanced Smad1 linker region phosphorylation by ERK further exaggerates the existing deficiency of BMP signalling, which leads to the uncontrolled proliferation of hPASMCs and pulmonary vascular remodelling.

### 1.7 Id proteins and PAH

PAH is characterized by a sustained elevation of pulmonary arterial pressure. The increased pressure usually results from a complex process of vascular remodelling and occlusion involving the endothelial, smooth muscle, and fibroblast components of the pre-capillary pulmonary arteries.<sup>91</sup> It is well recognized that BMPRII mutations are responsible for the majority of heritable PAH.<sup>92</sup> In addition, dysfunction of BMP signalling is found in idiopathic PAH and experimental models of PAH induced by chronic hypoxia, monocrotaline (MCT) exposure, and high flow.<sup>92</sup> The fact that *bmpr2*<sup>+/-</sup> mice do not spontaneously develop PAH suggests that additional 'second hits' or further dysfunction of BMP signalling are necessary to cause initiation and progression of PAH.<sup>67,93</sup> The restoration of BMP signalling has proved effective as a therapeutic strategy in preclinical models of disease.<sup>81</sup>

In PSMCs, the most consistent transcriptional targets of BMP/Smad signalling are the Id proteins (Figure 5). Our group has shown that cells harbouring a mutation in BMPRII failed to induce Id gene expression in response to BMPs, though this can be partly overcome by higher concentrations of BMPs. We also showed that loss of BMPRII function or knock-down of Id1 leads to loss of the growth suppressive effects of BMPs in PSMCs.<sup>40,74</sup> Hypoxia is a well-recognized stimulus for pulmonary hypertension. In a report that apparently contradicts some of these findings, de Caestecker and colleagues recently reported elevated Id1 and Id3 expression in hypoxic pulmonary VSMCs *in vivo* in a BMP-dependent manner. In response to chronic hypoxia, Id1 null mice did not develop more PH than wild types. An increase in Id3, but not Id2, expression in pulmonary VSMCs of Id1 null mice suggests that Id1/Id3 may play a compensatory role in regulating VSMC responses to chronic hypoxia.<sup>94</sup> Since Id1 and Id3 are known to compensate for each other in VSMCs, studies in VSMC-specific Id1/3 double KO mice are required to

further explore their role in hypoxic pulmonary hypertension. A marked reduction in the expression of Id proteins was also observed in MCT-treated and hypoxia-induced PAH models in rats.<sup>94,95</sup> All these studies point towards a major role of Id proteins in the complex process of PAH. However, the precise mechanisms by which the Id proteins contribute to the development of PAH are still not known.

#### 1.7.1 Crosstalk with other signalling pathways

Generally, Ids are thought to mediate mitogen-induced growth and inhibit systemic VSMC differentiation. However, in PSMCs, we observed minimal Id gene and protein induction by the mitogen platelet-derived growth factor (PDGF)-BB, and other angiogenesis-related growth factors.<sup>40,96</sup> BMP4-induced Id1 expression was negatively regulated by extracellular signal-regulated kinases 1 and 2 (ERK1/2) activation. The mechanism involved ERK1/2-dependent phosphorylation of the Smad1 linker region (serine 206), which inhibits C-terminal serine 463/465 phosphorylation and Smad nuclear accumulation. Taken together, these findings indicate an important interaction between ERK1/2 and Smad1/5 in the regulation of Id genes in PSMCs (Figure 5).<sup>74</sup>

#### 1.7.2 The potential therapeutic target for PAH

Prostanoids are one of the most effective clinical treatments for PAH. Although predominantly vasodilators, prostanoids may exert antiproliferative effects during long-term administration, which beneficially affect pulmonary vascular remodelling. We investigated the potential interaction between prostacyclin analogues and BMP signalling in PSMCs (Figure 6). We demonstrated that prostacyclin analogues enhance the growth suppressive effects of BMPs in human PSMCs through up-regulation of Id1 and provided direct evidence that overexpression of Id1 leads to growth suppression of PSMCs. We also provided

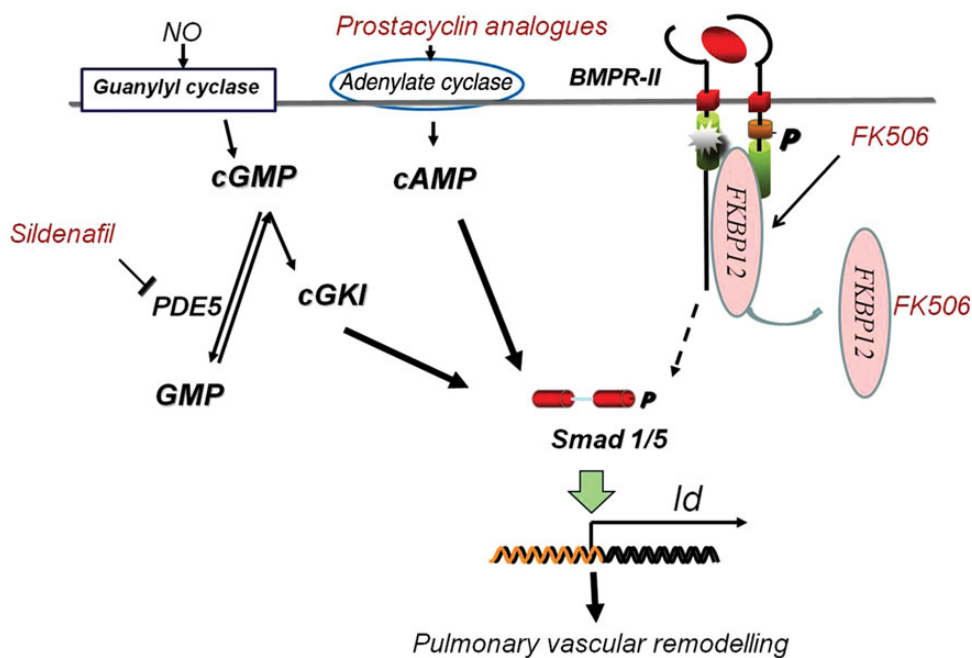

**Figure 6** The crosstalk between BMP/Id and other pathways currently targeted in the treatment of PAH. Prostacyclin analogues enhance intracellular cAMP levels to regulate BMP signalling in a Smad-dependent and Smad-independent manner. Sildenafil promotes BMP signalling through the interaction of cGKI with BMPRII and the formation of cGKI–Smad transcription factor complex on the Id gene promoter. Recently, FK506 was found to release BMPRII from FKBP12, thereby promoting BMP signalling to inhibit pulmonary vascular remodelling.



*in vivo* evidence in the MCT rat model of PAH that treprostinil infusion prevented progression of PAH and reduced muscularization of intra-acinar pulmonary arteries while increasing phosphorylation of Smad1/5 and Id1 gene expression in the lung without altering BMPRII expression.<sup>40</sup>

The interaction between cGMP and BMP receptors was also recently demonstrated in vascular cells.<sup>97</sup> We found that sildenafil enhances canonical BMP signalling via cyclic GMP and cGKI [cyclic nucleotide-dependent protein kinase G (PKG or cGKI), is activated by cGMP] *in vitro* and *in vivo* and partly restores deficient BMP signalling in BMPRII mutant PSMCs. Our findings demonstrate a novel mechanism of action of sildenafil in the treatment of PAH and suggest that targeting BMP signalling may be beneficial in this disease. Based on the knowledge that Ids are the major functional targets of BMP signalling in pulmonary vascular cells, an elegant study used the BMP response element from the Id1 promoter as a reporter to screen for compounds capable of inducing the expression of Id genes. The compounds screened included 3756 FDA approved drugs. Of these, Spiekerkoetter *et al.* identified the immune suppressant tacrolimus (FK506) as the most potent activator of the BMP response element. The mechanism involves FK506 binding to FK-binding protein-12 (FKBP12) to activate the BMP type I receptor, while also acting as an inhibitor of the phosphatase, calcineurin. *In vivo* FK506 proved beneficial in three different animal models of PAH, including the reversal of PAH in the sugen/hypoxia rat model. Experimental medicine studies are now underway in patients. Thus, the strategy of screening for compounds that up-regulate Id genes with high selectivity may prove a promising strategy for the treatment of PAH.

## 2. Conclusions

In summary, although Id proteins were initially identified as controllers of terminal myogenic differentiation, they play important roles in development including neural stem cell differentiation, osteoblast differentiation, and lymphocyte maturation. In the cardiovascular system, Id proteins play major roles in cardiogenesis. The major function of Id proteins in cancer appears to be to promote proliferation and inhibition of differentiation.<sup>32,98</sup> Although BMPs are critical regulators on Id protein expression, additional growth factors and cytokines regulate Id gene expression in a highly cell- and tissue-specific context to impact on vascular cell proliferation, differentiation, and function. Research in atherosclerosis has revealed that Id protein expression is important in the multistep process of disease development. Furthermore, targeting Id proteins have proved to be an effective therapeutic strategy in PAH where they impact on PSMC proliferation and EC survival. However, the role of the individual Id proteins in the complex process of vascular disease remains to be fully elucidated. Determining the regulation and function of Id proteins during vascular development and disease will contribute to our understanding of cardiovascular disease, particularly PAH, and will be essential to develop approaches with tissue selectivity for targeted therapies.

## Acknowledgements

We thank Rafia Al-Lamki and Neda Farahi for comments on the manuscript.

**Conflict of interest:** none declared.

## Funding

This work were supported by a grant from the British Heart Foundation (RG/08/002/24718) to N.W.M and a grant from China 1000 young talents plan to J.Y.

## References

- Panza JA, Quyyumi AA, Brush JE, Epstein SE. Abnormal endothelium-dependent vascular relaxation in patients with essential hypertension. *N Engl J Med* 1990;**323**:22–27.
- Dzau VJ, Braun-Dullaeus RC, Sedding DG. Vascular proliferation and atherosclerosis: new perspectives and therapeutic strategies. *Nat Med* 2002;**8**:1249–1256.
- Yang XD, Long L, Southwood M, Rudarakanchana N, Upton PD, Jeffery TK, Atkinson C, Chen HL, Trembath RC, Morrell NW. Dysfunctional smad signaling contributes to abnormal smooth muscle cell proliferation in familial pulmonary arterial hypertension. *Circ Res* 2005;**96**:1053–1063.
- Bergers G, Benjamin LE. Tumorigenesis and the angiogenic switch. *Nat Rev Cancer* 2003;**3**:401–410.
- Massari ME, Murre C. Helix-loop-helix proteins: regulators of transcription in eukaryotic organisms. *Mol Cell Biol* 2000;**20**:429–440.
- Forrest S, McNamara C. Id family of transcription factors and vascular lesion formation. *Arterioscler Thromb Vasc Biol* 2004;**24**:2014–2020.
- Lyden D, Hattori K, Dias S, Costa C, Blaikie P, Butros L, Chadburn A, Heissig B, Marks W, Witte L, Wu Y, Hicklin D, Zhu ZP, Hackett NR, Crystal RG, Moore MAS, Hajar KA, Manova K, Benezra R, Rafii S. Impaired recruitment of bone-marrow-derived endothelial and hematopoietic precursor cells blocks tumor angiogenesis and growth. *Nat Med* 2001;**7**:1194–1201.
- Moya IM, Umans L, Maas E, Pereira PNG, Beets K, Francis A, Sents W, Robertson EJ, Mummery CL, Huylebroeck D, Zwijsen A. Stalk cell phenotype depends on integration of Notch and Smad1/5 signaling cascades. *Dev Cell* 2012;**22**:501–514.
- Niola F, Zhao XD, Singh D, Castano A, Sullivan R, Lauria M, Nam HS, Zhuang Y, Benezra R, Di Bernardo D, Iavarone A, Lasorella A. Id proteins synchronize stemness and anchorage to the niche of neural stem cells. *Nat Cell Biol* 2012;**14**:477–487.
- Owens AP, Subramanian V, Moorleghe J, Guo ZH, McNamara CA, Cassis LA, Daugherty A. Angiotensin II induces a region-specific hyperplasia of the ascending aorta through regulation of inhibitor of differentiation 3. *Circ Res* 2010;**106**:611–619.
- Sakurai D, Tsuchiya N, Yamaguchi A, Okaji Y, Tsuno NH, Kobata T, Takahashi K, Tokunaga K. Crucial role of inhibitor of DNA binding/differentiation in the vascular endothelial growth factor-induced activation and angiogenic processes of human endothelial cells. *J Immunol* 2004;**173**:5801–5809.
- Valdimarsdottir G, Goumans MJ, Rosendahl A, Brugman M, Itoh S, Lebrin F, Sideras P, ten Dijke P. Stimulation of Id1 expression by bone morphogenetic protein is sufficient and necessary for bone morphogenetic protein-induced activation of endothelial cells. *Circulation* 2002;**106**:2263–2270.
- Benezra R, Davis RL, Lassar A, Tapscott S, Thayer M, Lockshon D, Weintraub H. Id: a negative regulator of helix-loop-helix DNA binding proteins. Control of terminal myogenic differentiation. *Ann N Y Acad Sci* 1990;**599**:1–11.
- Biggs J, Murphy EV, Israel MA. A human Id-like-helix loop helix protein expressed during early development. *Proc Natl Acad Sci USA* 1992;**89**:1512–1516.
- Christy BA, Sanders LK, Lau LF, Copeland NG, Jenkins NA, Nathans D. An Id-related helix loop helix protein encoded by a growth factor-inducible gene. *Proc Natl Acad Sci USA* 1991;**88**:1815–1819.
- Deed RW, Bianchi SM, Atherton GT, Johnston D, Santibanezkoref M, Murphy JJ, Norton JD. An immediate early human gene encodes an Id-like helix-loop-helix protein and is regulated by protein kinase C activation in diverse cell types. *Oncogene* 1993;**8**:599–607.
- Jen Y, Manova K, Benezra R. Expression patterns of Id1, Id2, and Id3 are highly related but distinct from that of Id4 during mouse embryogenesis. *Dev Dyn* 1996;**207**:235–252.
- Deed RW, Hara E, Atherton GT, Peters G, Norton JD. Regulation of Id3 cell cycle function by Cdk-2-dependent phosphorylation. *Mol Cell Biol* 1997;**17**:6815–6821.
- Hara E, Hall M, Peters G. Cdk2-dependent phosphorylation of Id2 modulates activity of E2A-related transcription factors. *EMBO J* 1997;**16**:332–342.
- Springhorn JP, Singh K, Kelly RA, Smith TW. Posttranscriptional regulation of Id1 activity in cardiac muscle. Alternative splicing of novel Id1 transcript permits homodimerization. *J Biol Chem* 1994;**269**:5132–5136.
- Miyazono K, Miyazawa K. Id: a target of BMP signaling. *Sci STKE* 2002;**151**:E40.
- Ciarrocchi A, Jankovic V, Shaked Y, Nolan DJ, Mittal V, Kerbel RS, Nimer SD, Benezra R. Id1 restrains p21 expression to control endothelial progenitor cell formation. *PLoS ONE* 2007;**2**:e1338.
- Wang H, Yu Y, Guo RW, Shi YK, Song MB, Chen JF, Yu SY, Yin YG, Gao P, Huang L. Inhibitor of DNA binding-1 promotes the migration and proliferation of endothelial progenitor cells *in vitro*. *Mol Cell Biochem* 2010;**335**:19–27.
- Abe JI. Bone morphogenetic protein (BMP) family, SMAD signaling and Id helix-loop-helix proteins in the vasculature: the continuous mystery of BMPs pleiotropic effects. *J Mol Cell Cardiol* 2006;**41**:4–7.
- Kumar MS, Hendrix JA, Johnson AD, Owens GK. Smooth muscle alpha-actin gene requires two E-boxes for proper expression *in vivo* and is a target of class I basic helix-loop-helix proteins. *Circ Res* 2003;**92**:840–847.

26. Forrest ST, Barringhaus KG, Perlegas D, Hammarskjold ML, McNamara CA. Intron retention generates a novel Id3 isoform that inhibits vascular lesion formation. *J Biol Chem* 2004;**279**:32897–32903.
27. Nickenig G, Baudler S, Muller C, Werner C, Werner N, Welzel H, Strehlow K, Bohm M. Redox-sensitive vascular smooth muscle cell proliferation is mediated by GSKF and Id3 in vitro and in vivo. *FASEB J* 2002;**16**:1077–1086.
28. Taylor AM, Li F, Thimmalapura P, Gerrity RG, Sarembock JJ, Forrest S, Rutherford S, McNamara CA. Hyperlipemia and oxidation of LDL induce vascular smooth muscle cell growth: an effect mediated by the HLH factor Id3. *J Vasc Res* 2006;**43**:123–130.
29. Taylor AM, Hanchett R, Natarajan R, Hedrick CC, Forrest S, Nadler JL, McNamara CA. The effects of leukocyte-type 12/15-lipoxygenase on Id3-mediated vascular smooth muscle cell growth. *Arterioscler Thromb Vasc Biol* 2005;**25**:2069–2074.
30. Wassmann K, Mueller CFH, Becher UM, Werner C, Jung A, Zimmer S, Steinmetz M, Nickenig G, Wassmann S. Interaction of inhibitor of DNA binding 3 (Id3) with Gut-enriched Kruppel-like factor (GSKLF) and p53 regulates proliferation of vascular smooth muscle cells. *Mol Cell Biochem* 2010;**333**:33–39.
31. Treguer K, Naye F, Thiebaud P, Fedou S, Soulet F, Theze N, Fauchoux C. Smooth muscle cell differentiation from human bone marrow: variations in cell type specific markers and Id gene expression in a new model of cell culture. *Cell Biol Int* 2009;**33**:621–631.
32. Lasorella A, Benezra R, Iavarone A. The Id proteins: master regulators of cancer stem cells and tumour aggressiveness. *Nat Rev Cancer* 2014;**14**:77–91.
33. Kiledjian M, Su LK, Kadesch T. Identification and characterization of two functional domains within the murine heavy-chain enhancer. *Mol Cell Biol* 1988;**8**:145–152.
34. De MF, Grove CA, Vedenko A, Alibes A, Gisselbrecht SS, Serrano L, Bulyk ML, Walhout AJ. Using a structural and logics systems approach to infer bHLH-DNA binding specificity determinants. *Nucleic Acids Res* 2011;**39**:4553–4563.
35. Kreider BL, Benezra R, Rovera G, Kadesch T. Inhibition of myeloid differentiation by the helix-loop-helix protein Id. *Science* 1992;**255**:1700–1702.
36. Melnikova IN, Christy BA. Muscle cell differentiation is inhibited by the helix-loop-helix protein Id3. *Cell Growth Differ* 1996;**7**:1067–1079.
37. Norton JD, Deed RW, Craggs G, Sablitzky F. Id helix-loop-helix proteins in cell growth and differentiation. *Trends Cell Biol* 1998;**8**:58–65.
38. Norton JD. Id helix-loop-helix proteins in cell growth, differentiation and tumorigenesis. *J Cell Sci* 2000;**113**:3897–3905.
39. Jen Y, Weintraub H, Benezra R. Overexpression of Id protein inhibits the muscle differentiation program: in vivo association of Id with E2A proteins. *Gene Dev* 1992;**6**:1466–1479.
40. Yang J, Li XH, Al Lamki RS, Southwood M, Zhao J, Lever AM, Grimminger F, Schermuly RT, Morrell NW. Smad-dependent and Smad-independent induction of Id1 by prostacyclin analogues inhibits proliferation of pulmonary artery smooth muscle cells in vitro and in vivo. *Circ Res* 2010;**107**:252–262.
41. Deed RW, Armitage S, Norton JD. Nuclear localization and regulation of Id protein through an E protein-mediated chaperone mechanism. *J Biol Chem* 1996;**271**:23603–23606.
42. Neuhold LA, Wold B. Hlh forced dimers: tethering Myod to E47 generates a dominant positive myogenic factor insulated from negative regulation by Id. *Cell* 1993;**74**:1033–1042.
43. Peverali FA, Ramqvist T, Saffrich R, Pepperkok R, Barone MV, Philipson L. Regulation of G(1) progression by E2A and Id helix-loop-helix proteins. *EMBO J* 1994;**13**:4291–4301.
44. Sawada S, Littman DR. A heterodimer of Heb and an E12-related protein interacts with the Cd4 enhancer and regulates its activity in T-cell lines. *Mol Cell Biol* 1993;**13**:5620–5628.
45. Liu KJ, Harland RM. Cloning and characterization of Xenopus Id4 reveals differing roles for Id genes. *Dev Biol* 2003;**264**:339–351.
46. Langlands K, Yin X, Anand G, Prochowick EV. Differential interactions of Id proteins with basic-helix-loop-helix transcription factors. *J Biol Chem* 1997;**272**:19785–19793.
47. Lin L, Zhou ZH, Zheng L, Alber S, Watkins S, Ray P, Kaminski N, Zhang YZ, Morse D. Cross talk between Id1 and its interactive protein Dril1 mediate fibroblast responses to transforming growth factor-beta in pulmonary fibrosis. *Am J of Pathol* 2008;**173**:337–346.
48. Bounpheng MA, Dimas JJ, Dodds SG, Christy BA. Degradation of Id proteins by the ubiquitin-proteasome pathway. *FASEB J* 1999;**13**:2257–2264.
49. Ling MT, Chiu YT, Lee TKW, Leung SCL, Fung MKL, Wang XH, Wong KF, Wong YC. Id-1 induces proteasome-dependent degradation of the HBX protein. *J Mol Biol* 2008;**382**:34–43.
50. Williams SA, Maecker HL, French DM, Liu JF, Gregg A, Silverstein LB, Cao TC, Carano RAD, Dixit VM. USP1 deubiquitinates ID proteins to preserve a mesenchymal stem cell program in osteosarcoma. *Cell* 2011;**146**:917–929.
51. Ying QL, Nichols J, Chambers I, Smith A. BMP induction of Id proteins suppresses differentiation and sustains embryonic stem cell self-renewal in collaboration with STAT3. *Cell* 2003;**115**:281–292.
52. Prabhu S, Ignatova A, Park ST, Sun XH. Regulation of the expression of cyclin-dependent kinase inhibitor p21 by E2A and Id proteins. *Mol Cell Biol* 1997;**17**:5888–5896.
53. Asrivatham AJ, Carey JP, Chaudhary J. ID1-, ID2-, and ID3-regulated gene expression in E2A positive or negative prostate cancer cells. *Prostate* 2007;**67**:1411–1420.
54. Bai G, Sheng NY, Xie ZH, Bian W, Yokota Y, Benezra R, Kageyama R, Guillemot F, Jing NH. Id sustains Hes1 expression to inhibit precocious neurogenesis by repressing negative autoregulation of Hes1. *Dev Cell* 2007;**13**:283–297.
55. Lasorella A, Stegmuller J, Guardavaccaro D, Liu GC, Carro MS, Rothschild G, Torre-Ubieta L, Pagano M, Bonni A, Iavarone A. Degradation of Id2 by the anaphase-promoting complex couples cell cycle exit and axonal growth. *Nature* 2006;**442**:471–474.
56. Lasorella A, Nosedà M, Beyna M, Iavarone A. Id2 is a retinoblastoma protein target and mediates signalling by Myc oncoproteins. *Nature* 2000;**407**:592–598.
57. Florio M, Hernandez MC, Yang H, Shu HK, Cleveland JL, Israel MA. Id2 promotes apoptosis by a novel mechanism independent of dimerization to basic helix-loop-helix factors. *Mol Cell Biol* 1998;**18**:5435–5444.
58. Doran AC, Meller N, Cutchins A, Deliri H, Oldham SN, McNamara CA. The helix-loop-helix factors Id3 and E47 are novel regulators of adiponectin. *Arterioscler Thromb Vasc Biol* 2008;**103**:624–634.
59. Loveys DA, Streiff MB, Kato GJ. E2A basic-helix-loop-helix transcription factors are negatively regulated by serum growth factors and by the Id3 protein. *Nucleic Acids Res* 1996;**24**:2813–2820.
60. Carey JPW, Asrivatham AJ, Galm O, Ghogomu TA, Chaudhary J. Inhibitor of differentiation 4 (Id4) is a potential tumor suppressor in prostate cancer. *BMC Cancer* 2009;**9**:173.
61. Thistlethwaite PA, Li X, Zhang X. Notch signaling in pulmonary hypertension. *Adv Exp Med Biol* 2010;**661**:279–298.
62. Ciarapica R, Annibali D, Raimondi L, Savino M, Nasi S, Rota R. Targeting Id protein interactions by an engineered HLH domain induces human neuroblastoma cell differentiation. *Oncogene* 2009;**28**:1881–1891.
63. Mern DS, Hasskarl J, Burwinkel B. Inhibition of Id proteins by a peptide aptamer induces cell-cycle arrest and apoptosis in ovarian cancer cells. *Br J Cancer* 2010;**103**:1237–1244.
64. Lane KB, Machado RD, Pauciuolo MW, Thomson JR, Phillips JA, Loyd JE, Nichols WC, Trembath RC. Heterozygous germline mutations in BMP2, encoding a TGF-beta receptor, cause familial primary pulmonary hypertension. *Nat Genet* 2000;**26**:81–84.
65. Machado RD, Thomson JR, Loyd JE, Nichols WC, Trembath RC. Heterozygous germline mutations in BMP2, encoding a TGF-beta receptor, cause familial primary pulmonary hypertension. *Thorax* 2000;**55**:A23.
66. Deng Z, Morse JH, Slager SL, Cuervo N, Moore KJ, Venetos G, Kalachikov S, Cayanis E, Fischer SG, Barst RJ, Hodge SE, Knowles JA. Familial primary pulmonary hypertension (gene PPH1) is caused by mutations in the bone morphogenetic protein receptor-II gene. *Am J Hum Genet* 2000;**67**:737–744.
67. Beppu H, Ichinose F, Kawai N, Jones RC, Yu PB, Zapol WM, Miyazono K, Li E, Bloch KD. BMP2 heterozygous mice have mild pulmonary hypertension and an impaired pulmonary vascular remodeling response to prolonged hypoxia. *Am J Physiol Lung Cell Mol Physiol* 2004;**287**:L1241–L1247.
68. Beppu H, Malhotra R, Beppu Y, Lepore JJ, Parmacek MS, Bloch KD. BMP type II receptor regulates positioning of outflow tract and remodeling of atrioventricular cushion during cardiogenesis. *Dev Biol* 2009;**331**:167–175.
69. Fraidenraich D, Stillwell E, Romero E, Wilkes D, Manova K, Basson CT, Benezra R. Rescue of cardiac defects in Id knockout embryos by injection of embryonic stem cells. *Science* 2004;**306**:247–252.
70. Zhao QS, Beck AJ, Vitale JM, Schneider JS, Gao SM, Chang C, Elson G, Leibovich SJ, Park JY, Tian B, Nam HS, Fraidenraich D. Developmental ablation of Id1 and Id3 genes in the vasculature leads to postnatal cardiac phenotypes. *Dev Biol* 2011;**349**:53–64.
71. Chen X, Zankl A, Niroomand F, Liu Z, Katus HA, Jahn L, Tiefenbacher C. Upregulation of ID protein by growth and differentiation factor 5 (GDF5) through a smad-dependent and MAPK-independent pathway in HUVMSC. *J Mol Cell Cardiol* 2006;**41**:26–33.
72. Liang YY, Brunicardi FC, Lin X. Smad3 mediates immediate early induction of Id1 by TGF-beta. *Cell Res* 2009;**19**:140–148.
73. Benezra R, Rafii S, Lyden D. The Id proteins and angiogenesis. *Oncogene* 2001;**20**:8334–8341.
74. Yang J, Davies RJ, Southwood M, Long L, Yang XD, Sobolewski A, Upton PD, Trembath RC, Morrell NW. Mutations in bone morphogenetic protein type II receptor cause dysregulation of Id gene expression in pulmonary artery smooth muscle cells: implications for familial pulmonary arterial hypertension. *Circ Res* 2008;**102**:1212–1221.
75. Nishiyama K, Takaji K, Kataoka K, Kurihara Y, Yoshimura M, Kato A, Ogawa H, Kurihara H. Id1 gene transfer confers angiogenic property on fully differentiated endothelial cells and contributes to therapeutic angiogenesis. *Circulation* 2005;**112**:2840–2850.
76. Ruzinova MB, Benezra R. Id proteins in development, cell cycle and cancer. *Trends Cell Biol* 2003;**13**:410–418.
77. Kowanetz M, Valcourt U, Bergstrom R, Heldin CH, Moustakas A. Id2 and Id3 define the potency of cell proliferation and differentiation responses to transforming growth factor [beta] and bone morphogenetic protein. *Mol Cell Biol* 2004;**24**:4241–4254.
78. Goumans MJ, Valdimarsdottir G, Itoh S, Lebrin F, Larsson J, Mummery C, Karlsson S, ten Dijke P. Activin receptor-like kinase (ALK)1 is an antagonistic mediator of lateral TGF-beta/ALK5 signaling. *Mol Cell* 2003;**12**:817–828.
79. Tian F, Zhou AX, Smits AM, Larsson E, Goumans MJ, Heldin CH, Boren J, Akyurek LM. Endothelial cells are activated during hypoxia via endoglin/ALK-1/SMAD1/5 signaling in vivo and in vitro. *Biochem Biophys Res Commun* 2010;**392**:283–288.
80. Ding BS, Nolan DJ, Butler JM, James D, Babazadeh AO, Rosenwaks Z, Mittal V, Kobayashi H, Shido K, Lyden D, Sato TN, Rabbany SY, Rafii S. Inductive angiocrine signals from sinusoidal endothelium are required for liver regeneration. *Nature* 2010;**468**:310–315.

81. Spiekerkoetter E, Tian XF, Cai J, Hopper RK, Sudheendra D, Li CYG, El Bizri N, Sawada H, Haghghat R, Chan R, Haghghat L, Perez VD, Wang LL, Reddy S, Zhao MM, Bernstein D, Solow-Cordero DE, Beachy PA, Wandless TJ, ten Dijke P, Rabinovitch M. FK506 activates BMPR2 rescues endothelial dysfunction, and reverses pulmonary hypertension. *J Clin Invest* 2013;**123**:3600–3613.
82. Volpert OV, Pili R, Sikder HA, Nelius T, Zaichuk T, Morris C, Shiflett CB, Devlin MK, Conant K, Alani RM. Id2 regulates angiogenesis through transcriptional repression of thrombospondin-1. *Cancer Cell* 2002;**2**:473–483.
83. Doebele RC, Schulze-Hoepfner FT, Hong J, Chlenski A, Zeitlin BD, Goel K, Gomes S, Liu Y, Abe MK, Nor JE, Lingen MW, Rosner MR. A novel interplay between Epac/Rap1 and mitogen-activated protein kinase kinase 5/extracellular signal-regulated kinase 5 (MEK5/ERK5) regulates thrombospondin to control angiogenesis. *Blood* 2009;**114**:4592–4600.
84. Mellick AS, Plummer PN, Nolan DJ, Gao DC, Bambino K, Hahn M, Catena R, Turner V, McDonnell K, Benezra R, Brink R, Swarbrick A, Mittal V. Using the transcription factor inhibitor of DNA binding 1 to selectively target endothelial progenitor cells offers novel strategies to inhibit tumor angiogenesis and growth. *Cancer Res* 2010;**70**:7273–7282.
85. Vendrov AE, Madamanchi NR, Hakim ZS, Rojas M, Runge MS. Thrombin and NAD(P)H oxidase-mediated regulation of CD44 and BMP4-Id pathway in VSMC, restenosis, and atherosclerosis. *Circ Res* 2006;**98**:1254–1263.
86. Doran AC, Lipinski MJ, Oldham SN, Garney JC, Campbell KA, Skaflen MD, Cutchins A, Lee DJ, Glover DK, Kelly KA, Galkina EV, Ley K, Witztum JL, Tsimikas S, Bender TP, McNamara CA. B-cell aortic homing and atheroprotection depend on Id3. *Circ Res* 2012;**110**:E1–12.
87. Matsumura ME, Li F, Berthoux L, Wei B, Lobe DR, Jeon C, Hammarskjold ML, McNamara CA. Vascular injury induces posttranscriptional regulation of the Id3 gene: cloning of a novel Id3 isoform expressed during vascular lesion formation in rat and human atherosclerosis. *Arterioscler Thromb Vasc Biol* 2001;**21**:1384.
88. Doran AC, Lehtinen AB, Meller N, Lipinski MJ, Slayton RP, Oldham SN, Skaflen MD, Yeboah J, Rich SS, Bowden DW, McNamara CA. Id3 is a novel atheroprotective factor containing a functionally significant single-nucleotide polymorphism associated with intima-media thickness in humans. *Circ Res* 2010;**106**:1303–1399.
89. Derwall M, Malhotra R, Lai CS, Beppu Y, Aikawa E, Sehra JS, Zapol WM, Bloch KD, Yu PB. Inhibition of bone morphogenetic protein signaling reduces vascular calcification and atherosclerosis. *Arterioscler Thromb Vasc Biol* 2012;**32**:613–622.
90. Kim CW, Song H, Kumar S, Nam D, Kwon HS, Chang KH, Son DJ, Kang DW, Brodie SA, Weiss D, Vega JD, berts-Grill N, Griendling K, Taylor WWR, Jo H. Anti-inflammatory and antiatherogenic role of BMP receptor II in endothelial cells. *Arterioscler Thromb Vasc Biol* 2013;**33**:1350–1359.
91. Morrell NW, Adnot S, Archer SL, Dupuis J, Jones PL, MacLean MR, McMurtry IF, Stenmark KR, Thistlethwaite PA, Weissmann N, Yuan JXJ, Weir EK. Cellular and molecular basis of pulmonary arterial hypertension. *J Am Coll Cardiol* 2009;**54**:S20–S31.
92. Long L, Crosby A, Yang XD, Southwood M, Upton PD, Kim DK, Morrell NW. Altered bone morphogenetic protein and transforming growth factor-beta signaling in rat models of pulmonary hypertension potential for activin receptor-like kinase-5 inhibition in prevention and progression of disease. *Circulation* 2009;**119**:566–576.
93. Long L, MacLean MR, Jeffery TK, Morecroft I, Yang XD, Rudarakanchana N, Southwood M, James V, Trembath RC, Morrell NW. Serotonin increases susceptibility to pulmonary hypertension in BMPR2-deficient mice. *Circ Res* 2006;**98**:818–827.
94. Lowery JW, Frump AL, Anderson L, DiCarlo GE, Jones MT, de Caestecker MP. ID family protein expression and regulation in hypoxic pulmonary hypertension. *Am J Physiol Reg Integr Comp Physiol* 2010;**299**:R1463–R1477.
95. Morty RE, Nejman B, Kwapiszewska G, Hecker M, Zakrzewicz A, Kouri FM, Peters DM, Dumitrascu R, Seeger W, Knaus P, Schermuly RT, Eickelberg O. Dysregulated bone morphogenetic protein signaling in monocrotaline-induced pulmonary arterial hypertension. *Arterioscler Thromb Vasc Biol* 2007;**27**:1072–1078.
96. Yang J, Li XH, Li Y, Southwood M, Ye LY, Long L, Al Lamki RS, Morrell NW. Id proteins are critical downstream effectors of BMP signaling in human pulmonary arterial smooth muscle cells. *Am J Physiol Lung Cell Mol Physiol* 2013;**305**:L312–L321.
97. Schwappacher R, Weiske J, Heining E, Ezerski V, Marom B, Henis YI, Huber O, Knaus P. Novel crosstalk to BMP signalling: cGMP-dependent kinase I modulates BMP receptor and Smad activity. *EMBO J* 2009;**28**:1537–1550.
98. Gupta GP, Perk J, Acharyya S, de Candia P, Mittal V, Todorova-Manova K, Gerald WL, Brogi E, Benezra R, Massague J. ID genes mediate tumor reinitiation during breast cancer lung metastasis. *Proc Natl Acad Sci USA* 2007;**104**:19506–19511.
